# Supplementary material for: Elevated FPR confers to radiochemoresistance and predicts clinical efficacy and outcome of metastatic colorectal cancer patients
Source: publisher site journal article supplement (doi:10.18632/aging.101864), 2019-03-21
Supplement: Supplementary file [file aging-v11i6-101864-supplementary-material-SD1.pdf]

**SUPPLEMENTARY FIGURES**

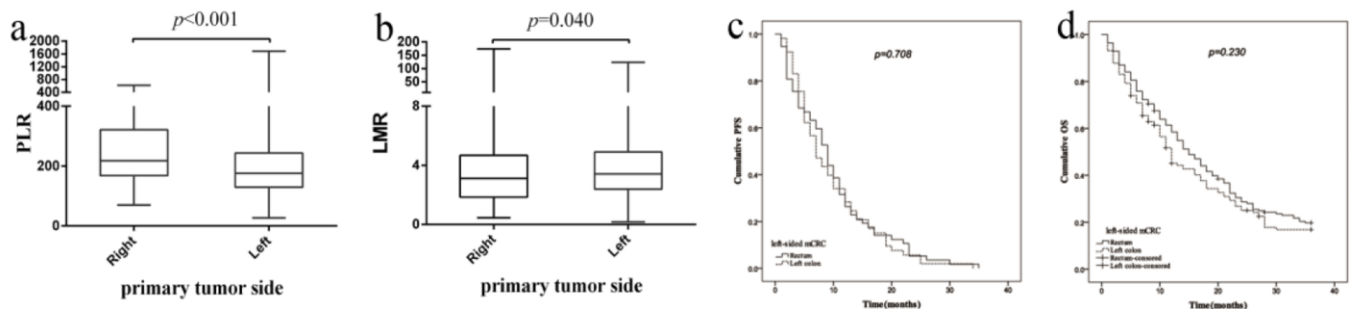

**Supplementary Figure 1. Comparison of PLR, LMR and OS between left- and right-sided mCRC patient in discovery cohort.** (a) PLR in discovery cohort; (b) LMR in discovery cohort; (c) Kaplan-Meier curve of left colon and rectum for PFS; d: Kaplan-Meier curve of left colon and rectum for OS.

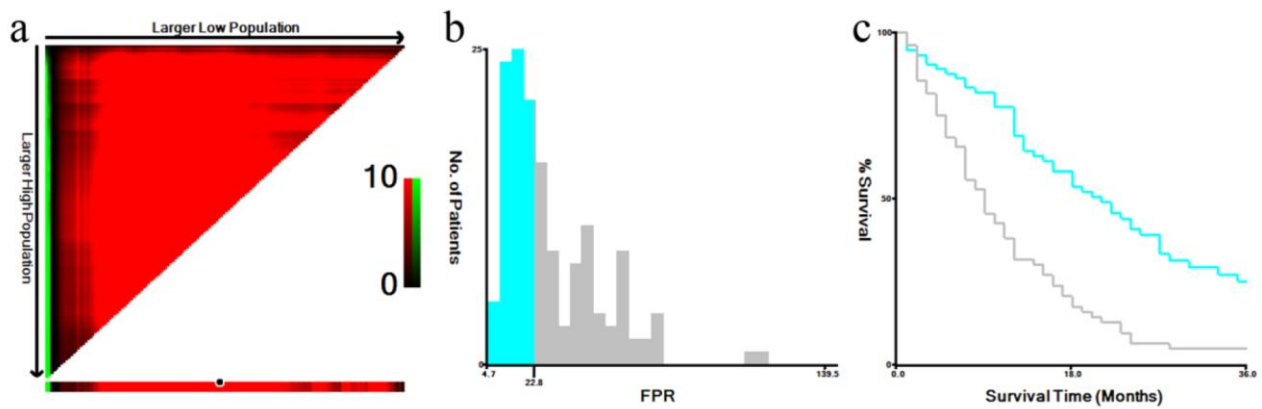

**Supplementary Figure 2. The optimal cut-off of pre-treatment FPR in discovery cohort using X-tile software.** (a) The data were represented graphically in a right-triangular grid where each point represents the data from a given set of divisions. The plots showed the  $\chi^2$  log-rank values produced, dividing them into two groups by the cut-off point. The optimal cut-points was determined by locating the brightest pixel on the X-tile plot. The distribution of number of patients was shown on the histogram (b) and corresponding populations were displayed on the Kaplan-Meier curve (c).

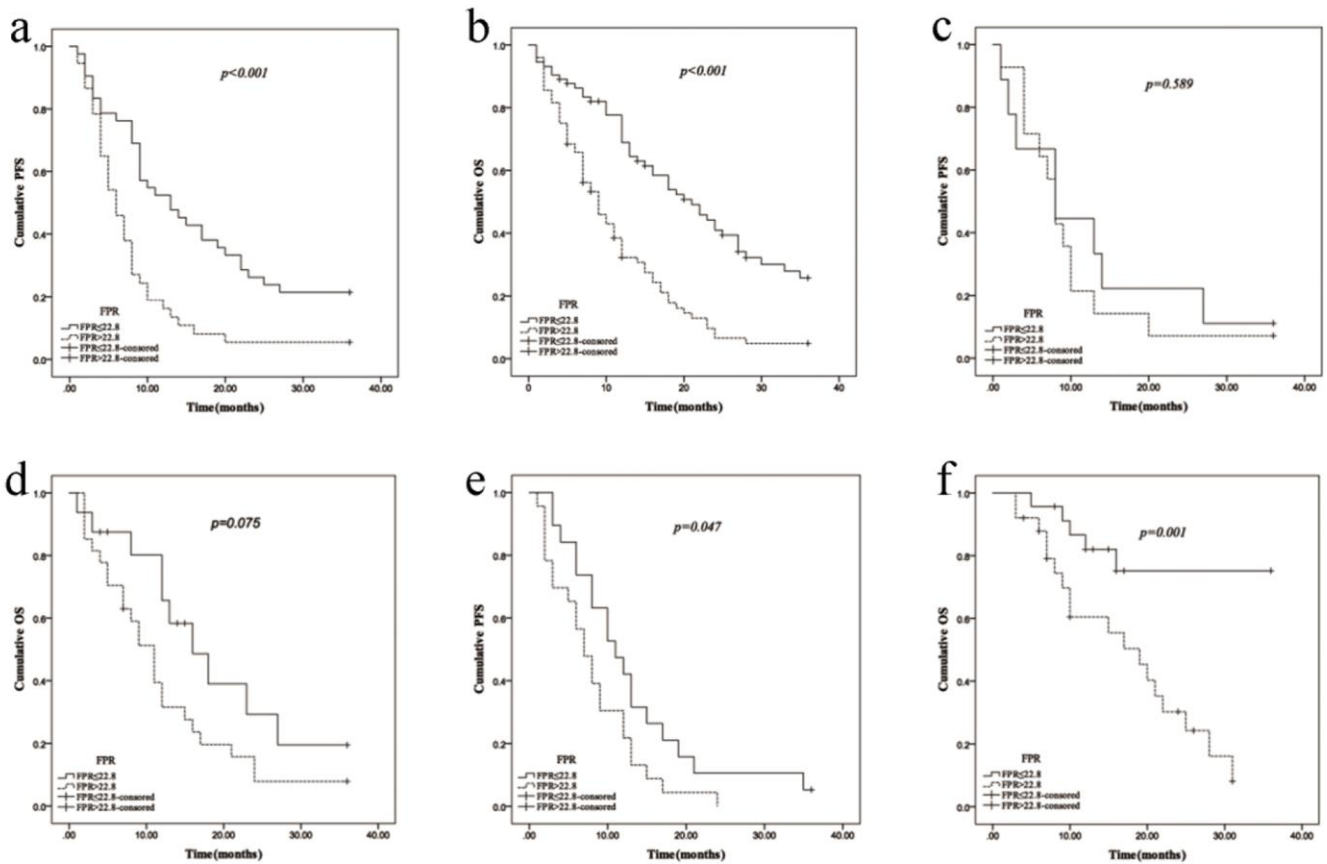

**Supplementary Figure 3. Kaplan-Meier curves of FPR for 3 years' PFS and OS in two cohorts.** (a) Kaplan-Meier curve of FPR for PFS in discovery cohort; (b) Kaplan-Meier curve of FPR for OS in discovery cohort; (c) Kaplan-Meier curve of FPR for PFS of right-sided mCRC patient in discovery cohort; (d) Kaplan-Meier curve of FPR for OS of right-sided mCRC patient in discovery cohort; (e) Kaplan-Meier curve of FPR for PFS in validation cohort; f: Kaplan-Meier curve of FPR for OS in validation cohort.

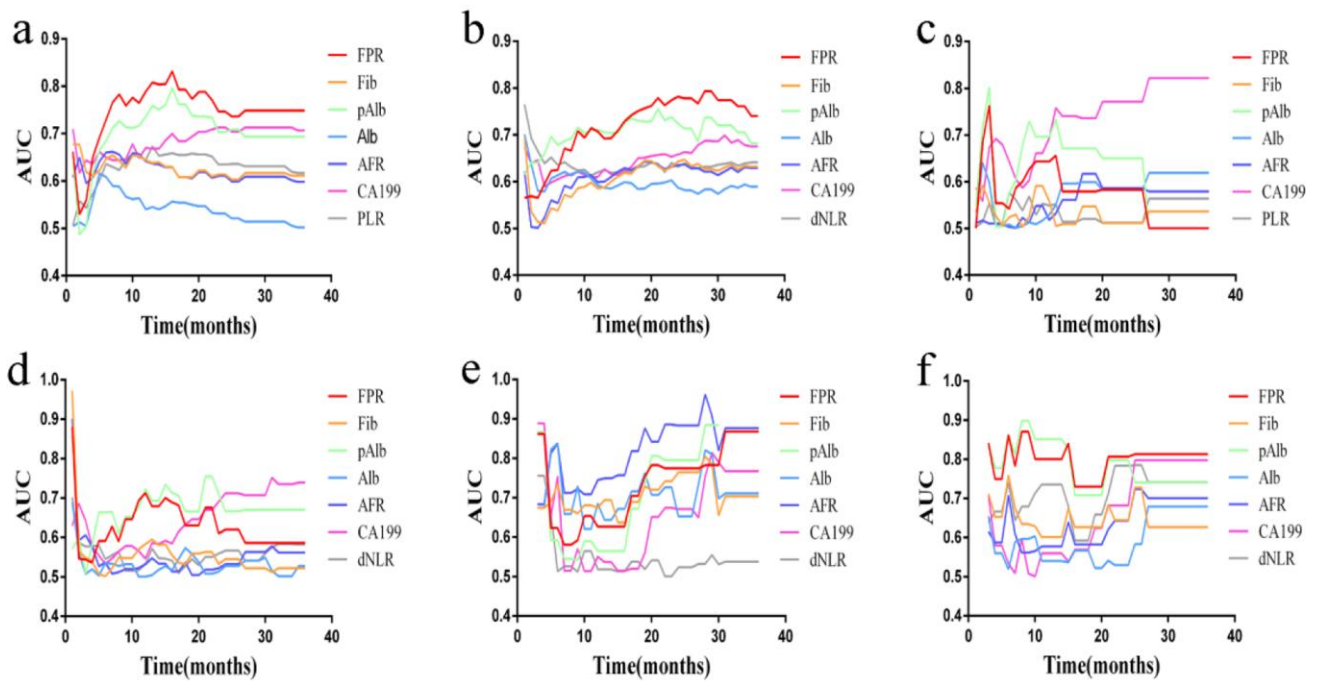

**Supplementary Figure 4. Time-dependent ROC analysis of FPR for 3 years' PFS and OS in two cohorts.** (a) Time-dependent ROC analysis for PFS in discovery cohort; (b) Time-dependent ROC analysis for OS in discovery cohort. (c) Time-dependent ROC analysis for PFS of right-sided mCRC patient in discovery cohort; (d) Time-dependent ROC analysis for OS of right-sided mCRC patient in discovery cohort. (e) Time-dependent ROC analysis for OS of left-sided mCRC patient in validation cohort. (f) Time-dependent ROC analysis for OS of right-sided mCRC patient in validation cohort.
