# Supplementary material for: Elevated FPR confers to radiochemoresistance and predicts clinical efficacy and outcome of metastatic colorectal cancer patients
Source: publisher site journal article supplement (doi:10.18632/aging.101864), 2019-03-21
Supplement: Supplementary file [file aging-v11i6-101864-supplementary-material-SD2.pdf]

**SUPPLEMENTARY TABLES**

**Supplementary Table 1. Clinical and pathological characteristics in 507 colorectal cancer patients.**

| Variables             | Categories              | No. of patients (%)    |                        |
|-----------------------|-------------------------|------------------------|------------------------|
|                       |                         | Discovery cohort (430) | Validation cohort (77) |
| Gender                | Male                    | 243(56.51%)            | 41(53.25%)             |
|                       | Female                  | 187(43.49%)            | 36(46.75%)             |
| Age                   | ≤60years                | 206(47.90%)            | 51(66.23%)             |
|                       | >60years                | 224(52.1%)             | 26(33.77%)             |
| Tobacco               | Yes                     | 88(20.47%)             | 14(18.18%)             |
|                       | No                      | 342(79.53%)            | 63(81.82%)             |
| Alcohol               | Yes                     | 71(16.51%)             | 7(9.09%)               |
|                       | No                      | 359(83.49%)            | 70(90.91%)             |
| Hypertension          | Yes                     | 60(13.95%)             | 14(18.18%)             |
|                       | No                      | 370(86.05%)            | 63(81.82%)             |
| Diabetes              | Yes                     | 30(6.98%)              | 4(5.19%)               |
|                       | No                      | 400(93.02%)            | 73(94.81%)             |
| Tumor side            | Left                    | 302(70.23%)            | 46(59.74%)             |
|                       | Right                   | 128(29.77%)            | 31(40.26%)             |
| Metastasis            | Liver                   | 220(51.16%)            | 31(40.26%)             |
|                       | Lung                    | 24(5.58%)              | 2(2.60%)               |
|                       | bone                    | 11(2.56%)              | 0(0.00%)               |
|                       | Peritoneu               | 88(20.47%)             | 15(19.48%)             |
|                       | Urogenital system       | 37(8.60%)              | 5(6.49%)               |
| No palliative surgery | Multiple                | 50(11.63%)             | 24(31.17%)             |
|                       | No treatment            | 88(20.47%)             | -                      |
|                       | Radiochemotherapy alone | 152(35.35%)            | 41(53.25%)             |

|                    |                               |                       |                       |
|--------------------|-------------------------------|-----------------------|-----------------------|
| Palliative surgery | Surgery alone                 | 64(14.88%)            | -                     |
|                    | Surgery and radiochemotherapy | 126(29.30%)           | 36(46.75%)            |
| CEA                | ≤5 ng/mL                      | 106(24.65%)           | 19(24.68%)            |
|                    | >5 ng/mL                      | 292(67.91%)           | 43(55.84%)            |
|                    | NA                            | 32(7.44%)             | 15(19.48%)            |
| CA199              | ≤37 U/mL                      | 185(43.02%)           | 21(27.27%)            |
|                    | >37 U/mL                      | 212(49.30%)           | 42(54.55%)            |
|                    | NA                            | 33(7.68%)             | 14(18.18%)            |
| NLR(median, IQR)   |                               | 3.14(2.25-4.60)       | 3.23(2.41-4.48)       |
| dNLR(median, IQR)  |                               | 3.57(2.58-5.23)       | 3.71(2.78-5.08)       |
| LMR(median, IQR)   |                               | 3.31(2.23-4.86)       | 2.97(2.22-4.24)       |
| PLR(median, IQR)   |                               | 189.92(140.26-255.25) | 169.37(128.07-224.92) |
| Fib (median, IQR)  | g/L                           | 3.48 (2.90-4.26)      | 3.87(3.09-4.43)       |
| Alb (median, IQR)  | g/L                           | 38.85 (35.10-41.70)   | 39.83(36.92-44.12)    |
| pAlb (median, IQR) | mg/L                          | 154.00(102.52-199.77) | 160.00(111.32-208.14) |
| AFR (median, IQR)  |                               | 11.13 (8.83-14.05)    | 10.42(8.32-12.61)     |
| FPR (median, IQR)  |                               | 23.18(15.31-43.08)    | 25.50(14.57-36.83)    |
| Number of death    |                               | 346(80.47%)           | 45(58.44%)            |
| PFS (median, IQR)  | months                        | 8.0(4.0-13.0)         | 14.5(8.0-20.0)        |
| OS (median, IQR)   | months                        | 12.0(5.0-23.0)        | 16.0(10.0-27.0)       |

**Abbreviation:** Fib: fibrinogen; Alb: albumin; pAlb: pre-albumin; AFR: albumin to fibrinogen ratio; FPR: fibrinogen to pre-albumin ratio; PLR: Platelet to lymphocyte ratio; dNLR: derived neutrophil to lymphocyte ratio; NLR: Neutrophil granulocyte to lymphocyte ratio; LMR: lymphocyte to monocyte ratio; CEA: carcinoembryonic antigen; CA199: carbohydrate antigen 19-9; NA: not available; PFS: progression-free survival; OS: Overall survival; IQR: interquartile ranges.

**Supplementary Table 2. Univariate and multivariate analyses of prognostic factors for 3 years' PFS and OS by Cox regression model in discovery cohort.**

| Variables                | Progression-free survival |                  |                       |                  | Overall survival    |                  |                       |                  |
|--------------------------|---------------------------|------------------|-----------------------|------------------|---------------------|------------------|-----------------------|------------------|
|                          | Univariate analysis       |                  | Multivariate analysis |                  | Univariate analysis |                  | Multivariate analysis |                  |
|                          | Crude HR(95% CI)          | p-value          | Adjusted HR( 95% CI)  | p-value          | Crude HR(95% CI)    | p-value          | Adjusted HR( 95% CI)  | p-value          |
| Sex (male)               | 1.208(0.876-1.667)        | 0.249            | -                     | -                | 1.149(0.928-1.422)  | 0.203            | -                     | -                |
| Age (>60 years)          | 1.107 (0.805-1.521)       | 0.531            | -                     | -                | 1.488(1.203-1.841)  | <b>&lt;0.001</b> | 1.477(1.159-1.882)    | <b>0.002</b>     |
| Alcohol (yes)            | 0.739(0.466-1.172)        | 0.198            | -                     | -                | 0.906(0.684-1.199)  | 0.490            | -                     | -                |
| Tobacco (yes)            | 0.663(0.437-1.004)        | 0.052            | -                     | -                | 0.806(0.619-1.048)  | 0.107            | -                     | -                |
| Hypertension (yes)       | 0.859(0.556-1.328)        | 0.494            | -                     | -                | 0.829(0.608-1.131)  | 0.237            | -                     | -                |
| Diabetes (yes)           | 1.066(0.652-1.744)        | 0.798            | -                     | -                | 0.721(0.468-1.110)  | 0.138            | -                     | -                |
| Primary side (Right)     | 1.261(0.887-1.795)        | 0.197            | -                     | -                | 1.367(1.089-1.716)  | <b>0.007</b>     | -                     | -                |
| Palliative surgery (Yes) | 0.736(0.535-1.014)        | 0.060            | -                     | -                | 0.521(0.419-0.648)  | <b>&lt;0.001</b> | 0.511(0.402-0.649)    | <b>&lt;0.001</b> |
| Radio-chemotherapy (Yes) | 1.111(0.755-1.633)        | 0.594            | -                     | -                | 0.568(0.457-0.705)  | <b>&lt;0.001</b> | 0.600(0.473-0.762)    | <b>&lt;0.001</b> |
| CEA (>5ng/mL)            | 1.475(1.020-2.132)        | <b>0.039</b>     | -                     | -                | 1.407(1.085-1.825)  | <b>0.010</b>     | -                     | -                |
| CA199 (>37U/mL)          | 2.170(1.540-3.057)        | <b>&lt;0.001</b> | 2.049(1.446-2.094)    | <b>&lt;0.001</b> | 1.727(1.379-2.164)  | <b>&lt;0.001</b> | 1.678(1.329-2.119)    | <b>&lt;0.001</b> |
| PLR(>166.1)              | 1.749(1.260-2.429)        | <b>0.001</b>     | 1.601(1.106-2.317)    | <b>0.013</b>     | 1.636(1.306-2.050)  | <b>&lt;0.001</b> | -                     | -                |
| dNLR(>3.7)               | 1.620(1.175-2.234)        | <b>0.003</b>     | -                     | -                | 1.791(1.448-2.215)  | <b>&lt;0.001</b> | 1.629(1.298-2.044)    | <b>&lt;0.001</b> |
| NLR (>2.9)               | 1.811(1.312-2.500)        | <b>&lt;0.001</b> | -                     | -                | 1.786(1.434-2.223)  | <b>&lt;0.001</b> | -                     | -                |
| LMR(>1.5)                | 0.539(0.305-0.953)        | <b>0.034</b>     | -                     | -                | 0.470(0.342-0.646)  | <b>&lt;0.001</b> | -                     | -                |
| Fib (>3.9 g/L)           | 2.257(1.573-3.239)        | <b>&lt;0.001</b> | -                     | -                | 1.606(1.251-2.062)  | <b>&lt;0.001</b> | 1.344(1.024-1.764)    | <b>0.033</b>     |
| Alb (>35.7 g/L)          | 0.726(0.491-1.073)        | 0.108            | -                     | -                | 0.648(0.515-0.815)  | <b>&lt;0.001</b> | -                     | -                |
| pAlb (>139.8mg/L)        | 0.491(0.302-0.799)        | <b>0.004</b>     | -                     | -                | 0.443(0.306-0.640)  | <b>&lt;0.001</b> | 0.478(0.321-0.711)    | <b>&lt;0.001</b> |
| AFR (>9.9)               | 0.541(0.378-0.775)        | <b>0.001</b>     | -                     | -                | 0.579(0.452-0.740)  | <b>&lt;0.001</b> | -                     | -                |
| FPR (>22.8)              | 2.326(1.419-3.815)        | <b>0.001</b>     | 1.896 (1.097-3.279)   | 0.022            | 2.598(1.768-3.816)  | <b>&lt;0.001</b> | 1.583(1.042-2.405)    | <b>0.031</b>     |

**Abbreviation:** HR: hazard ratio; CI: confidence interval; Fib: fibrinogen; Alb: albumin; pAlb: pre-Albumin; AFR: albumin to fibrinogen ratio; FPR: fibrinogen to pre-Albumin ratio; PLR: Platelet to lymphocyte ratio; dNLR: derived neutrophil to lymphocyte ratio; NLR: Neutrophil granulocyte to lymphocyte ratio; LMR: lymphocyte to monocyte ratio; CEA: carcinoembryonic antigen; CA199: carbohydrate antigen 19-9; adjusted HR (95%) was adjusted by sex, age, alcohol, tobacco, hypertension, diabetes, primary side, palliative resection, radio-chemotherapy, CEA, CA199, PLR, dNLR, NLR, LMR.

**Supplementary Table 3. Univariate and multivariate analyses of prognostic factors for 3 years' PFS and OS by Cox regression model in left-sided mCRC patient in discovery cohort.**

| Variables                  | Progression-free survival |                  |                       |              | Overall survival    |                  |                       |                  |
|----------------------------|---------------------------|------------------|-----------------------|--------------|---------------------|------------------|-----------------------|------------------|
|                            | Univariate analysis       |                  | Multivariate analysis |              | Univariate analysis |                  | Multivariate analysis |                  |
|                            | Crude HR(95% CI)          | p-value          | Adjusted HR( 95% CI)  | p-value      | Crude HR(95% CI)    | p-value          | Adjusted HR( 95% CI)  | p-value          |
| Sex (male)                 | 1.065(0.728-1.559)        | 0.745            | -                     | -            | 1.082(0.835-1.402)  | 0.553            | -                     | -                |
| Age (>60 years)            | 1.353(0.855-1.812)        | 0.253            | -                     | -            | 1.723(1.329-2.234)  | <b>&lt;0.001</b> | 1.723(1.285-2.310)    | <b>&lt;0.001</b> |
| Alcohol (yes)              | 0.775(0.467-1.285)        | 0.323            | -                     | -            | 0.878(0.633-1.219)  | 0.438            | -                     | -                |
| Tobacco (yes)              | 0.651(0.411-1.031)        | 0.067            | -                     | -            | 0.753(0.554-1.022)  | 0.069            | -                     | -                |
| Hypertension (yes)         | 1.001(0.604-1.658)        | 0.997            | -                     | -            | 0.913(0.632-1.319)  | 0.628            | -                     | -                |
| Diabetes (yes)             | 0.966(0.544-1.890)        | 0.966            | -                     | -            | 0.732(0.426-1.256)  | 0.258            | -                     | -                |
| Palliative resection (Yes) | 0.735(0.505-1.070)        | 0.108            | -                     | -            | 0.501(0.383-0.654)  | <b>&lt;0.001</b> | 0.592(0.441-0.794)    | <b>&lt;0.001</b> |
| Radio-chemotherapy (Yes)   | 1.258 (0.788-2.009)       | 0.336            | -                     | -            | 0.611(0.468-0.798)  | <b>&lt;0.001</b> | 0.716(0.528-0.972)    | <b>0.032</b>     |
| CEA (>5ng/mL)              | 1.393(0.915-2.120)        | 0.122            | -                     | -            | 1.274(0.940-1.727)  | 0.118            | -                     | -                |
| CA199 (>37U/mL)            | 1.977(1.332-2.935)        | <b>0.001</b>     | 1.940(1.298-2.900)    | <b>0.001</b> | 1.698(1.298-2.222)  | <b>&lt;0.001</b> | 1.566(1.185-2.072)    | <b>0.002</b>     |
| PLR(>166.1)                | 1.937(1.326-2.828)        | <b>0.001</b>     | 1.600(1.052-2.234)    | <b>0.028</b> | 1.840(1.413-2.395)  | <b>&lt;0.001</b> | -                     | -                |
| dNLR(>3.7)                 | 1.932(1.323-2.822)        | <b>0.001</b>     | -                     | -            | 2.051(1.585-2.655)  | <b>&lt;0.001</b> | 1.726(1.294-2.303)    | <b>&lt;0.001</b> |
| NLR (>2.9)                 | 2.023(1.382-2.959)        | <b>&lt;0.001</b> | -                     | -            | 1.995(1.532-2.598)  | <b>&lt;0.001</b> | -                     | -                |
| LMR(>1.5)                  | 0.437(0.221-0.867)        | <b>0.018</b>     | -                     | -            | 0.374(0.253-0.553)  | <b>&lt;0.001</b> | -                     | -                |
| Fib (>3.9 g/L)             | 3.165(2.023-4.954)        | <b>&lt;0.001</b> | 1.934(1.153-3.243)    | <b>0.012</b> | 1.917(1.403-2.619)  | <b>&lt;0.001</b> | 1.428(1.017-2.007)    | <b>0.040</b>     |
| Alb (>35.7 g/L)            | 0.461(0.289-0.735)        | <b>0.001</b>     | 0.603(0.370-0.983)    | <b>0.042</b> | 0.511(0.384-0.681)  | <b>&lt;0.001</b> | 0.716(0.522-0.982)    | <b>0.038</b>     |
| pAlb (>139.8mg/L)          | 0.444(0.246-0.801)        | <b>0.007</b>     | -                     | -            | 0.414(0.266-0.644)  | <b>&lt;0.001</b> | 0.517(0.322-0.831)    | <b>0.006</b>     |
| AFR (>9.9)                 | 0.344(0.219-0.541)        | <b>&lt;0.001</b> | 0.568(0.340-0.951)    | <b>0.032</b> | 0.453(0.332-0.618)  | <b>&lt;0.001</b> | -                     | -                |
| FPR (>22.8)                | 3.150(1.708-5.810)        | <b>&lt;0.001</b> | 2.254(1.167-4.354)    | <b>0.015</b> | 2.984(1.874-4.753)  | <b>&lt;0.001</b> | 1.769(1.066-2.935)    | <b>0.027</b>     |

**Abbreviation:** HR: hazard ratio; CI: confidence interval; Fib: fibrinogen; Alb: albumin; pAlb: pre-Albumin; AFR: albumin to fibrinogen ratio; FPR: fibrinogen to pre-Albumin ratio; PLR: Platelet to lymphocyte ratio, dNLR: derived neutrophil to lymphocyte ratio; NLR: Neutrophil granulocyte to lymphocyte ratio; LMR: lymphocyte to monocyte ratio; CEA: carcinoembryonic antigen; CA199: carbohydrate antigen 19-9; adjusted HR (95%) was adjusted by sex, age, alcohol, tobacco, hypertension, diabetes, palliative resection, radio-chemotherapy, CEA, CA199, PLR, dNLR, NLR, LMR.

**Supplementary Table 4. Univariate and multivariate analyses of prognostic factors for 3 years' PFS and OS by Cox regression model in right-sided mCRC patient in discovery cohort.**

| Variables                  | Progression-free survival |                 |                       |                 | Overall survival    |                  |                       |                  |
|----------------------------|---------------------------|-----------------|-----------------------|-----------------|---------------------|------------------|-----------------------|------------------|
|                            | Univariate analysis       |                 | Multivariate analysis |                 | Univariate analysis |                  | Multivariate analysis |                  |
|                            | Crude HR(95% CI)          | <i>p</i> -value | Adjusted HR( 95% CI)  | <i>p</i> -value | Crude HR(95% CI)    | <i>p</i> -value  | Adjusted HR( 95% CI)  | <i>p</i> -value  |
| Sex (male)                 | 1.895(1.031-3.483)        | <b>0.039</b>    | 2.380(1.212-4.674)    | <b>0.012</b>    | 1.445(0.990-2.109)  | 0.057            | -                     | -                |
| Age (>60 years)            | 0.762 (0.418-1.390)       | 0.376           | -                     | -               | 1.069(0.734-1.558)  | 0.728            | -                     | -                |
| Alcohol (yes)              | 0.743(0.229-2.410)        | 0.621           | -                     | -               | 1.128(0.654-1.948)  | 0.664            | -                     | -                |
| Tobacco (yes)              | 0.937(0.334-2.631)        | 0.902           | -                     | -               | 1.196(0.712-2.008)  | 0.499            | -                     | -                |
| Hypertension (yes)         | 0.573(0.241-1.361)        | 0.207           | -                     | -               | 0.662(0.370-1.183)  | 0.164            | -                     | -                |
| Diabetes (yes)             | 1.095(0.487-2.464)        | 0.826           | -                     | -               | 0.665(0.323-1.369)  | 0.269            | -                     | -                |
| Palliative resection (Yes) | 0.699(0.378-1.292)        | 0.254           | -                     | -               | 0.493(0.336-0.723)  | <b>&lt;0.001</b> | 0.351(0.227-0.543)    | <b>&lt;0.001</b> |
| Radio-chemotherapy (Yes)   | 0.832(0.419-1.653)        | 0.600           | -                     | -               | 0.522(0.356-0.766)  | <b>0.001</b>     | 0.424(0.277-0.648)    | <b>&lt;0.001</b> |
| CEA (>5ng/mL)              | 1.701(0.779-3.714)        | 0.182           | -                     | -               | 1.747(1.052-2.901)  | 0.031            | -                     | -                |
| CA199 (>37U/mL)            | 2.750(1.362-5.554)        | <b>0.005</b>    | 3.110(1.517-6.376)    | <b>0.002</b>    | 1.726(1.138-2.619)  | <b>0.010</b>     | 1.829(1.194-2.801)    | <b>0.006</b>     |
| PLR(>166.1)                | 1.812 (0.523-2.286)       | 0.812           | -                     | -               | 0.866(0.546-1.372)  | 0.539            | -                     | -                |
| dNLR(>3.7)                 | 1.008(0.546-1.859)        | 0.980           | -                     | -               | 1.265(0.868-1.844)  | 0.221            | -                     | -                |
| NLR (>2.9)                 | 1.305(0.712-2.393)        | 0.389           | -                     | -               | 1.287(0.867-1.909)  | 0.210            | -                     | -                |
| LMR(>1.5)                  | 0.834(0.298-2.339)        | 0.731           | -                     | -               | 0.737(0.426-1.273)  | 0.273            | -                     | -                |
| Fib (>3.9 g/L)             | 1.146(0.603-2.176)        | 0.677           | -                     | -               | 1.024(0.668-1.570)  | 0.912            | -                     | -                |
| Alb (>35.7 g/L)            | 1.713 (0.818-3.589)       | 0.153           | -                     | -               | 1.075(0.724-1.595)  | 0.720            | -                     | -                |
| pAlb (>139.8mg/L)          | 0.613(0.252-1.492)        | 0.281           | -                     | -               | 0.511(0.257-1.014)  | 0.055            | -                     | -                |
| AFR (>9.9)                 | 1.256 (0.664-2.377)       | 0.458           | -                     | -               | 1.049(0.684-1.608)  | 0.828            | -                     | -                |
| FPR (>22.8)                | 1.265(0.516-3.102)        | 0.607           | -                     | -               | 1.904(0.906-4.002)  | 0.089            | -                     | -                |

**Abbreviation:** HR: hazard ratio; CI: confidence interval; Fib: fibrinogen; Alb: albumin; pAlb: pre-Albumin; AFR: albumin to fibrinogen ratio; FPR: fibrinogen to pre-Albumin ratio; PLR: Platelet to lymphocyte ratio, dNLR: derived neutrophil to lymphocyte ratio; NLR: Neutrophil granulocyte to lymphocyte ratio; LMR: lymphocyte to monocyte ratio; CEA: carcinoembryonic antigen; CA199: carbohydrate antigen 19-9; adjusted HR (95%) was adjusted by sex, age, alcohol, tobacco, hypertension, diabetes, palliative resection, radio-chemotherapy, CEA, CA199, PLR, dNLR, NLR, LMR.

**Supplementary Table 5. Univariate and multivariate analyses of prognostic factors for 3 years' PFS and OS by Cox regression model in validation cohort.**

| Variables                  | Progression-free survival |              |                       |         | Overall survival    |              |                       |              |
|----------------------------|---------------------------|--------------|-----------------------|---------|---------------------|--------------|-----------------------|--------------|
|                            | Univariate analysis       |              | Multivariate analysis |         | Univariate analysis |              | Multivariate analysis |              |
|                            | Crude HR(95% CI)          | p-value      | Adjusted HR( 95% CI)  | p-value | Crude HR(95% CI)    | p-value      | Adjusted HR( 95% CI)  | p-value      |
| Sex (male)                 | 1.051(0.631-1.752)        | 0.847        | -                     | -       | 1.029(0.568-1.865)  | 0.925        | -                     | -            |
| Age (>60 years)            | 1.024(0.594-1.765)        | 0.932        | -                     | -       | 0.957(0.376-2.435)  | 0.926        | -                     | -            |
| Alcohol (yes)              | 0.559(0.223-1.401)        | 0.214        | -                     | -       | 0.950(0.374-2.414)  | 0.914        | -                     | -            |
| Tobacco (yes)              | 0.872 (0.430-1.772)       | 0.706        | -                     | -       | 1.379(0.681-2.793)  | 0.372        | -                     | -            |
| Hypertension (yes)         | 1.467(0.777-2.767)        | 0.237        | -                     | -       | 1.840(0.926-3.657)  | 0.082        | -                     | -            |
| Diabetes (yes)             | 1.593 (0.491-5.173)       | 0.438        | -                     | -       | 2.651(0.933-7.533)  | 0.067        | -                     | -            |
| Primary side(Right)        | 0.608(0.355-1.041)        | 0.070        | -                     | -       | 0.718(0.388-1.330)  | 0.292        | -                     | -            |
| Palliative resection (Yes) | 0.688(0.415-1.139)        | 0.146        | -                     | -       | 0.368(0.197-0.688)  | <b>0.002</b> | 0.328(0.160-0.670)    | <b>0.002</b> |
| CEA (>5ng/mL)              | 1.616(0.859-3.037)        | 0.136        | -                     | -       | 2.433(1.127-5.252)  | <b>0.024</b> | 3.242(1.385-7.586)    | <b>0.007</b> |
| CA199 (>37U/mL)            | 1.244(0.689-2.244)        | 0.469        | -                     | -       | 1.604(0.798-3.224)  | 0.185        | -                     | -            |
| PLR(>166.1)                | 1.724(1.021-2.911)        | <b>0.042</b> | -                     | -       | 1.540(0.840-2.826)  | 0.163        | -                     | -            |
| dNLR(>3.7)                 | 1.518(0.914-2.521)        | 0.107        | -                     | -       | 1.750(0.962-3.185)  | 0.067        | -                     | -            |
| NLR (>2.9)                 | 1.466(0.884-2.432)        | 0.138        | -                     | -       | 1.536(0.842-2.801)  | 0.162        | -                     | -            |
| LMR(>1.5)                  | 0.965(0.437-2.129)        | 0.930        | -                     | -       | 1.274(0.455-3.568)  | 0.644        | -                     | -            |
| Fib (>3.9 g/L)             | 1.474(0.878-2.474)        | 0.142        | -                     | -       | 2.233(1.234-4.414)  | <b>0.009</b> | 2.498(1.191-5.239)    | <b>0.015</b> |
| Alb (>35.7 g/L)            | 0.977(0.506-1.886)        | 0.945        | -                     | -       | 0.593(0.302-1.164)  | 0.129        | -                     | -            |
| pAlb (>139.8mg/L)          | 0.627(0.337-1.167)        | 0.141        | -                     | -       | 0.397(0.176-0.897)  | <b>0.026</b> | -                     | -            |
| AFR (>9.9)                 | 0.698(0.412-1.184)        | 0.182        | -                     | -       | 0.569(0.302-1.072)  | 0.081        | -                     | -            |
| FPR (>22.8)                | 1.914(1.022-3.583)        | <b>0.042</b> | -                     | -       | 4.473(1.648-12.141) | <b>0.003</b> | 4.206(1.159-15.266)   | <b>0.029</b> |

**Abbreviation:** HR: hazard ratio; CI: confidence interval; Fib: fibrinogen; Alb: albumin; pAlb: pre-Albumin; AFR: albumin/fibrinogen ratio; FPR: fibrinogen/pre-Albumin ratio; PLR: Platelet/lymphocyte ratio, dNLR: derived neutrophil to lymphocyte ratio; NLR: Neutrophil granulocyte/lymphocyte ratio; LMR: lymphocyte/monocyte ratio; CEA: carcinoembryonic antigen; CA199: carbohydrate antigen 19-9; adjusted HR (95%) was adjusted by sex, age, alcohol, tobacco, hypertension, diabetes, primary side, palliative resection, CEA, CA199, PLR, dNLR, NLR, LMR.

**Supplementary Table 6. Univariate and multivariate analyses of prognostic factors for 3 years' PFS and OS by Cox regression model in left-sided mCRC patient in validation cohort.**

| Variables                  | Progression-free survival |                 |                       |                 | Overall survival    |                 |                       |                 |
|----------------------------|---------------------------|-----------------|-----------------------|-----------------|---------------------|-----------------|-----------------------|-----------------|
|                            | Univariate analysis       |                 | Multivariate analysis |                 | Univariate analysis |                 | Multivariate analysis |                 |
|                            | Crude HR(95% CI)          | <i>p</i> -value | Adjusted HR( 95% CI)  | <i>p</i> -value | Crude HR(95% CI)    | <i>p</i> -value | Adjusted HR( 95% CI)  | <i>p</i> -value |
| Sex (male)                 | 1.286(0.647-2.556)        | 0.347           | -                     | -               | 0.964(0.457-2.035)  | 0.924           | -                     | -               |
| Age (>60 years)            | 1.359(0.520-3.551)        | 0.532           | -                     | -               | 1.513(0.641-3.572)  | 0.345           | -                     | -               |
| Alcohol (yes)              | 0.744(0.225-1.461)        | 0.628           | -                     | -               | 1.430(0.428-4.778)  | 0.561           | -                     | -               |
| Tobacco (yes)              | 1.386 (0.596-3.226)       | 0.448           | -                     | -               | 1.871(0.821-4.265)  | 0.136           | -                     | -               |
| Hypertension (yes)         | 0.548(0.186-1.612)        | 0.275           | -                     | -               | 1.045(0.396-2.758)  | 0.929           | -                     | -               |
| Diabetes (yes)             | 1.607 (0.376-6.870)       | 0.522           | -                     | -               | 3.382(0.969-11.805) | 0.056           | -                     | -               |
| Palliative resection (Yes) | 0.387(0.186-0.803)        | <b>0.011</b>    | 0.186(0.064-0.542)    | <b>0.002</b>    | 0.389(0.179-0.844)  | <b>0.017</b>    | 0.421(0.181-0.977)    | <b>0.044</b>    |
| CEA (>5ng/mL)              | 1.344(0.506-3.568)        | 0.553           | -                     | -               | 2.049(0.746-5.626)  | 0.164           | -                     | -               |
| CA199 (>37U/mL)            | 1.139(0.519-2.150)        | 0.745           | -                     | -               | 1.196(0.528-2.711)  | 0.668           | -                     | -               |
| PLR(>166.1)                | 0.868(0.440-1.713)        | 0.683           | -                     | -               | 1.111(0.527-2.341)  | 0.781           | -                     | -               |
| dNLR(>3.7)                 | 1.089(0.529-2.241)        | 0.818           | -                     | -               | 1.237(0.583-2.624)  | 0.580           | -                     | -               |
| NLR (>2.9)                 | 1.221(0.610-2.445)        | 0.574           | -                     | -               | 1.060(0.503-2.233)  | 0.878           | -                     | -               |
| LMR(>1.5)                  | 2.936(0.689-12.506)       | 0.145           | -                     | -               | 1.831(0.433-7.736)  | 0.411           | -                     | -               |
| Fib (>3.9 g/L)             | 1.348(0.675-2.693)        | 0.348           | -                     | -               | 2.616(1.092-6.265)  | <b>0.031</b>    | 2.960(1.071-8.180)    | <b>0.036</b>    |
| Alb (>35.7 g/L)            | 1.431(0.544-3.768)        | 0.468           | -                     | -               | 0.387(0.164-0.915)  | <b>0.031</b>    | 0.115(0.028-0.467)    | <b>0.003</b>    |
| pAlb (>139.8mg/L)          | 0.534(0.222-1.283)        | 0.160           | -                     | -               | 0.382(0.127-1.148)  | 0.087           | -                     | -               |
| AFR (>9.9)                 | 0.735(0.361-1.497)        | 0.397           | -                     | -               | 0.520(0.227-1.190)  | 0.122           | -                     | -               |
| FPR (>22.8)                | 1.420(0.616-3.276)        | 0.410           | -                     | -               | 4.112(1.126-15.015) | <b>0.032</b>    | -                     | -               |

**Abbreviation:** HR: hazard ratio; CI: confidence interval; Fib: fibrinogen; Alb: albumin; pAlb: pre-Albumin; AFR: albumin/fibrinogen ratio; FPR: fibrinogen/pre-Albumin ratio; PLR: Platelet/lymphocyte ratio, dNLR: derived neutrophil to lymphocyte ratio; NLR: Neutrophil granulocyte/lymphocyte ratio; LMR: lymphocyte/monocyte ratio; CEA: carcinoembryonic antigen; CA199: carbohydrate antigen 19-9; adjusted HR (95%) was adjusted by sex, age, alcohol, tobacco, hypertension, diabetes, palliative resection, CEA, CA199, PLR, dNLR, NLR, LMR.

**Supplementary Table 7. Univariate and multivariate analyses of prognostic factors for 3 years' PFS and OS by Cox regression model in right-sided mCRC patient in validation cohort.**

| Variables                  | Progression-free survival |                 |                       |                 | Overall survival    |                 |                       |                 |
|----------------------------|---------------------------|-----------------|-----------------------|-----------------|---------------------|-----------------|-----------------------|-----------------|
|                            | Univariate analysis       |                 | Multivariate analysis |                 | Univariate analysis |                 | Multivariate analysis |                 |
|                            | Crude HR(95% CI)          | <i>p</i> -value | Adjusted HR( 95% CI)  | <i>p</i> -value | Crude HR(95% CI)    | <i>p</i> -value | Adjusted HR( 95% CI)  | <i>p</i> -value |
| Sex (male)                 | 0.783(0.334-1.836)        | 0.574           | -                     | -               | 1.059(0.384-1.914)  | 0.912           | -                     | -               |
| Age (>60 years)            | 1.154(0.516-2.581)        | 0.728           | -                     | -               | 0.713(0.259-1.967)  | 0.514           | -                     | -               |
| Alcohol (yes)              | 0.471(0.110-2.018)        | 0.628           | -                     | -               | 0.757(0.172-3.140)  | 0.714           | -                     | -               |
| Tobacco (yes)              | 0.471 (0.110-.018)        | 0.310           | -                     | -               | 0.757(0.172-3.140)  | 0.714           | -                     | -               |
| Hypertension (yes)         | 3.233(1.156-9.042)        | <b>0.025</b>    | -                     | -               | 3.506(1.265-9.715)  | <b>0.016</b>    | -                     | -               |
| Diabetes (yes)             | 1.664 (0.216-12.822)      | 0.625           | -                     | -               | 1.523(0.198-11.701) | 0.686           | -                     | -               |
| Palliative resection (Yes) | 0.924(0.414-2.060)        | 0.847           | -                     | -               | 0.241(0.077-0.750)  | <b>0.014</b>    | -                     | -               |
| CEA (>5ng/mL)              | 1.639(0.636-4.227)        | 0.306           | -                     | -               | 2.282 (0.697-7.466) | 0.173           | -                     | -               |
| CA199 (>37U/mL)            | 1.549(0.582-4.123)        | 0.381           | -                     | -               | 3.287(0.726-14.882) | 0.123           | -                     | -               |
| PLR(>166.1)                | 3.892(1.508-10.047)       | <b>0.005</b>    | 3.158(1.086-9.182)    | <b>0.035</b>    | 2.283(0.773-6.747)  | 0.135           | -                     | -               |
| dNLR(>3.7)                 | 2.430(1.012-5.836)        | <b>0.047</b>    | -                     | -               | 3.584(1.129-11.376) | <b>0.030</b>    | -                     | -               |
| NLR (>2.9)                 | 2.054(0.856-4.930)        | 0.107           | -                     | -               | 3.025(0.948-9.649)  | 0.061           | -                     | -               |
| LMR(>1.5)                  | 0.435(0.136-1.396)        | 0.162           | -                     | -               | 0.890(0.201-3.952)  | 0.879           | -                     | -               |
| Fib (>3.9 g/L)             | 1.859(0.781-4.425)        | 0.161           | -                     | -               | 2.106 (0.761-5.828) | 0.152           | -                     | -               |
| Alb (>35.7 g/L)            | 0.696(0.251-1.926)        | 0.485           | -                     | -               | 0.930(0.299-2.890)  | 0.900           | -                     | -               |
| pAlb (>139.8mg/L)          | 0.782(0.286-2.140)        | 0.632           | -                     | -               | 0.354(0.094-1.333)  | 0.125           | -                     | -               |
| AFR (>9.9)                 | 0.580(0.243-1.385)        | 0.220           | -                     | -               | 0.642(0.232-1.775)  | 0.393           | -                     | -               |
| FPR (>22.8)                | 2.845(0.940-8.615)        | 0.064           | -                     | -               | 4.538(0.938-21.958) | 0.060           | -                     | -               |

**Abbreviation:** HR: hazard ratio; CI: confidence interval; Fib: fibrinogen; Alb: albumin; pAlb: pre-Albumin; AFR: albumin/fibrinogen ratio; FPR: fibrinogen/pre-Albumin ratio; PLR: Platelet/lymphocyte ratio, dNLR: derived neutrophil to lymphocyte ratio; NLR: Neutrophil granulocyte/lymphocyte ratio; LMR: lymphocyte/monocyte ratio; CEA: carcinoembryonic antigen; CA199: carbohydrate antigen 19-9; adjusted HR (95%) was adjusted by sex, age, alcohol, tobacco, hypertension, diabetes, palliative resection, CEA, CA199, PLR, dNLR, NLR, LMR.
